# Supplementary material for: A gustatory receptor tuned to the steroid plant hormone brassinolide in Plutella xylostella (Lepidoptera: Plutellidae)
Source: eLife. 2020 Dec 11;9:e64114. doi: 10.7554/eLife.64114 (PMC7806260; doi:10.7554/eLife.64114)
Supplement: Figure 1—source data 1. [file elife-64114-fig1-data1.xlsx]

## Sheet: Sheet1
Amino acid sequences of GRs in Plutella xylostella
>PxylGr1
RFEKKSWKCVYSFLSLLGQIFITVMCFYKIVYSDSSLKATSKFYVLTYVLPHFMSCTEQLDPSLDQRLARRCNATCAVVLTLALVEHILSLLQAFAGAAHCFPDAPVYEGFVRHFYPWVFNFLPYSPYLGIMTQFLHFQSTFIWNFSDLFVICMSYYLTSRLDLVNQKLLNAQGKYLPELFWRSTREEYGRATQLVRKVDEAISGVVFMSFANNLFFVCFQLFNTLDSTTGAGPGKGYEAAAYFLFSLVYLISRSVAVRSVAVSLGAAQVHSASAVPAPVLYDVPSPVYCIEVQRFLDQVNGDHVALSGLQFFSVTRGLLLTVAGTIVTYELVMVQFNAPSSASPASATAATLLNLNESSTLPMP
>PxylGr2
RFVKVSWKCVYTALMLSGQLFMTLTCVIEVFYADDVMQSIIIYFKVNSVLQHGVSHNGGVRFIGRVEEVNPASDGRLVWRCNVTCVIILSMSFLEHLLSILSDVYWANACSPSPVDTQEEFYRLLYPWIFRSLPYNPLLAVMCQIFHIQATFTWNFSDLFVICISYYLIRRLQLVNKKLHAICGKKYGESFWRSTREQYGRATQLVRRVDRVISGVVFISFANNLFFICLQLFHTLEVQPVAGFITTLYFSFSLVYLLTRSVSMSLIAAQVHTASTVPAPVLYNVSSSEYCEEVQRFVSQVNGEKVALSGLQFFSVTRGLLLTVAGTIVTYELVMFQINSPGSRNYVTPGPPTVTNISSVFST
>PxylGr3
YVFFYSSVFVNSIMFCRISVKWPALAAAVEETEEADPLKDPAVTSRCNRAVVVIATLALTEHLLMWISKVARLSDCYPEPRRSYQTFIHSNYPFVFELGLPFSLPLAFALQYVTFITTMNWNYSDVFIICISYYLRARFHQLNNKINDAKGKYVGAWFWRRARSEYTRLVELVHRVDDVISPVVFVSFASNLFFICFQLYYSIATNHCRSLHTVSYRQMHLSASSRIFFGYERETYLVFSVTLLLLRSVAVSLIAAGVHTATLEPAAALYSVPSPVFCIEVQRFIDQVHGSIVALTGLRLFNVTRGLFLSVAGTVVTYELVLFQFSAAADRHHGDPGDDNSTFFVPHMD
>PxylGr4
MHSVFSAARCFGVPVCGGGAARAWAALLLALHVCIEGGSVYKLVKNLAGLTAYSTGNRDVVARLSGAIFYGNALLSLVVFWRLRAAWARLLRDWAGAERGGALPLPPDKALRRNLWLVVAVVAVCSCVEHGMSMAANINLDYPPPIVFKEYILNSHAFLIIPSDYSLPLGIAIFVISKAATILWNFQDMVIILVSLGLASRYGRLNKYVHHLTKMESISGHTGSENDYASLQAWRRVREAFVRQAALVRRADAELGSLILLSNSNNFYFICLQVFNGAGGEDGMSLNKVYYLTSVAWLCARACAVVLAAAEVNVRSRTALGFIYEYPDRSYNVEVQRLEKQLTKDVVALSGKGFFYLNRGILLEVVSSIIKYELVLLEFDKK
>PxylGr5
MNDNRFRVYNPNQNEEIRKRDMMGKNGSTDLMGNGSYQAKDLHGPQITAADGYMLDEHDSFYLTTKSLLVLFQIMGVMPIMRVSRHAKTTKRTTFNWISKATLWAYLVWSLECIVVVKVGRERLETFQNSSNKRFDEVIYNIIFLSILIPHFLLPIASWRHGSQVAIFKNMWTHYQLKYLKITGTPIVFPNLYSLTWGLCIFSWGLSFAVILSQHYLQDDFELWHSFAYYHIIAMLDGFCSLWYINCNAFGTASKGLATNLHKALEADHPALKLAQYRHLWVDLSHMMQQLGRAYSNMYGIYCMVIFFTTTISLYGALSEILEHGLSYKEMGLFVIVGYCMTLLFIICNEAYHATRKVGHEFQVRLLNVNLGSIDRNTQREVEMFLVAIAKNPPIMNLD…
>PxylGr7
MIPDHMFEDGINNSLLRRDMRHIQQSKTVCEKSLRDYEQEQRDLLSSQDGDTCEIHDQFYRDHKLLLVLFRALAVMPITRSSPGTITFSWRSSATIYAVCFYIAATAVVLTVGYERIMILRSIRRFDDYIYAILFVVFLVPHFWIPFVGWGVAHQVAIYKTNWGKFQVRYYRVTGENLKFPNLRTLIVVISVGCLLLAVCFLLSLCALLDGFLLRHTAAYYHIITMINMNCALWYINCKGVKIASQSLAECFRRDVDAECSAGLISRSRYLWLNLSELLQLLGNAYARTYSTYCLFMFANITIAIYGALSEIVDHGFGFSFKEVGLFVDAAYCSTLLFIFADCSHKSTLMVAAGVQETLLSIDVISVDRATQKEIDHFIQAIEMNPAVVSLKGYANINR…
>PxylGr8
MSLYSSNAIFPKTEMPIPNGFPPHLNGNRNPKNKMIFLDVKPPRTPNMKSSAPTIRTLKNNLTVPQINRDIIYENIKPVVTILRVLGVFPVSRPRPGVNLFHLASPSMLYSVIAFFSLVTYVLYLSLHKVQILRTAEGKFEEAVIEYLFTVYLFPMTAVPILWYETRKIAGVLNGWVDFEVAYKSLSGRVLPVKLYKKALIISIIIPLLSTASVIITHVTMVHFKLTQIIPYVFLEILTYILGGYWYLLCETLSVCANILAEDFQQTLRHIGPAGKVAEYRALWLRLSKLARDTGIANCYTFTFVSLYLFLIITLSIYGLLSQISEGFGIKDIGLALTACCSIFLLFFICDEAHYASHNVRTHFQKKLLMVELSWMNTDAQTEVNMFLRATEMNPSQIS…
>PxylGr10
MPPPAVLVNSLVFVQDEHYLDNISRTVIHILALLGVNRIPLLPKCYNQNTKNIAIICSFFVMFYFITNSFLASGGLLTDMSEYIAVTTLGFLTCKRLRLFFNDIANFDRLVNLRPRNKYVLRCTKLGLVITTHTIFCIIYIFWTRSWRMRFDQWIIYIIRIIRLFEFYFYGHLVSLLHARMKLINHYIGLSLKDHDNENSHVMQRIEYDYEAISGPPHNVSDFSFLMDLYRVIIAGCDHLTNAILYQHEHLYLAYVFMGGVAVASFVPCVYCEDLKTEVQVLRKQLASVLFRIRLDKRSRVSARALLALTHERDLSVSLLGMLRVDISLPLHYVSLLVTYLIILLQFQKVRGYNWVLF
>PxylGr11
MAPVVVKVNTYINKKHNAVDSLTKILVASGTIVGLNRTQLLGSTYSKTIYVASLVWSIVLIIGGYVALRNIGYFYLSLMFSEYIFCVVMCYVTRKQLHLFFLHVNKFDAKVRCCPKTGHILRLNKALYLVIVMSVVSTTLFLYCLSCYAGSIAASLAPLRFLHIIEHVLFAHLLSNLYPRLKLISHCMELSLSKCKNLDLAAFQRGFENYDLAVFGNLSKNVDELMDLYNTLYTAYVHLIQATKWQLLRNSADSLPVPPLPQSASHACFVLGNVLVLCGPCLAGDQLLHELAVLKRLLASRIYENKMDKRSRVSARALLALTGAHGLGVSMLGMLRVDISLPLHYVSLLVTYLIILLQFNKVYFRSDWGM
>PxylGr12
MSSRLPEDSLVPAQHKEVTITLDFITKIFINSQVVLGLNRVRLIDDYSKKKKILISLLSIYVINCFCLLIQIRNFLGVWIVRSVFITCIILSFTKCKTLRQFFVAINEFDRDAGCTPRTSYIIRKNAILYVLIVMVIICLCLVIFAYGKQDGLFHAMCDLPFRLILATEFIFYGHLLGLLYTRIQLIIYFIQMSQSGNQRKQYKQIRFGFKYTVTEGRENCIPNTELLMDLYEKLITANEHLADAIKWQMLRVALSLPLHYVSLLVTYLIILLQFEKVNSKV
>PxylGr13
MSRPPPVLVNTILETENEYFIDTISSIAIHLQALIGLNRIPLLHNYFNIYNKTIERAALIYSITSVVTVFSLTAYFTDQLVADVFEYVVTAAAGFITYKRLRLFYITIAHFDRQVNCRPKTKYILKNNKLLYITFFVTTFSVIYRTWELGLTLDSGIYTIFRLMHKSELFMYGHLFSLLCPRIKLINQLMTQTLSDDGSSSGDHVMQINKDDFEQLHGPPCSLSKICLFVDLYKTLINACNNLVNAIKYQVSVEDRPLHVARFAVFLGGNVASLLGPCACCERLRAGARALRKQLASALVGNRLDKRSRVSARALLALTGAHGLGVSLRGMLRVDISLPLHYVSLLVTYLIILLQFQKVIGNNIHV
>PxylGr14
MAQKMLVNTLTPGAPVAVDPISQVFIKVELLFGLNRLRVLDRQSFRRKFLVTLYCVSVNLVILYLAVSSCPVSTNFRMMLNITTYYFNVIFSFIVCGKLRLYFNEMNTFDMAVSCKPKVLAFLKQHAILHVIMVVVVVADTVSFLVREKHACQFFIFHLLALIEYYFLAHLFCTIDPRLRLINFFVESLLNKSTRTDIRDRPTFFKHCTQCKPVRDCRDIHFLMDLYEIIINAHCRLIDAVKWQESNPLSYWEVFSSALYIGSNILCLLMPCAHRDQIHGEVRRLRVLLASLLYENNICKRSRGTARAMLLLTHEYDLSVSLLGMLRVDISLPLHYVSLLVTYLIILLQFQKVQT
>PxylGr15
MPPPRPHRVLVNTLTGDDDHDVLDPISRVFIKAEAAVGINRLHLLEGQSPCSKKLYWIAGIYCNIMVIFCAYISDHGQFHVKTVLDISAYFFNVVFSFVTAHRLKLYFHEINTFDKAVCCRPKYSELLKQNVMLHIMVALVMAGAGATFFIRFWKSKDTYTHIIIIHIQRVCELYFYAHLFCIIEPRLKLINFYVASSRINTDDTVCIKPEGFEYFSQAKSHKDFTNMKFLMDLYEILVTAHRHLVNAIKWQDGPPVDIVKLLPAVFFVGGNVLVLAVPCARRDQLQAEVRRLRALLASALFDHHLDKRSRVSARALLALTGAHGPGVALLGTRRVSRLGMLRVDISLPLHYVSLLVTYLIILLQFQKVNRI
>PxylGr16
MVHSTVLVNNLVPDENSVTVDPMSQLFVRVELMFGLNRVHMLDKLTPRRKIFATIYAVSVNIALSTLMYFNCPCNDYQDIKSIIEFMAYTFNVIYSFFACNKLKLYFHEIDKFDRAVSCRPKLFAFLKQHVMLHIILMLILIIEIVAFFMKFLNAPTFRWQFLAFHLVQMMELYFLSHLFCIINPRIKLINFFFDSSSEKFDITDISQWPKGYEYFSKHKIKKLQEVCSLMDMYLIIVNAHAQLINGIKWQEDSPWNQWVTIASMCFVVGNIMCLLLPCVHRDQLQYEVRRLRMLVALRLYENKMNKRSRVSARALLALTGAHGLGVSLLGMLRVDISLPLHYVSLLVTYLIILLQFQKVNRV
>PxylGr17
MTRVDTAQHNNGVKAKSIEVLPDNVTSILSCVKPLLFLENLFGIFRFRNNSGKLHLSGVNVKILGIGTFIVYIVIFYTFTDVLRFGRKKLLDNVPTFILHVEYIVTIVLTSFVLVKTNIEIYLGFSEIDKSLYINADTTFYKRSRRHTYLLLGSILLVHFSYNLLPYMFNLFSIETLIIWPVYFLQDLEILFFCKLICMLKTRLHIINKHLNNAACICNGNRNIYTITGEALTDFLILKKIRIVNLASVYHKIAHLCSLVNELFNFLIFMSLISVFFYTLITICMTLYYVQIELDVKTTAWLSIKIVWNIIEMGHIVSIIVVCEMLVTTRKKTKVLITEIIINYNLQETMRMEAKSFLKLVEAWPLKISVYDMFFVDTSLLLKFINVCTVYLIFMLQIP…
>PxylGr18
MPVLIICKITVLKTLVMATMVDDENKRIRRTKVSKAKKIKDVFFAMQPAIFAEYLFCVNRISKTNGEVRPPRNKFKLLGVFATLFYFTIITIYIVNNIHKVGGGNESWVYKVSFFPSIVFIVGYIIFVNLNHFVHCECNLEIYVAFKEIDTLLNINTNNNFYCKCFKQNVMIISIVFICHILYHISECLFLIGSFDWALVWPAYFFHDLEKCILCSLICMTKNRLNLINERLKHIIHGSKLNDENESNTTCVYSVYRSEDQGNARMSEIKDLALAYNIIGELYLKINQVFNFIMLIGLIGAFSYVVITIWATLYYHRLGGPIYASMSLLSTTVWVVNESVSTFIICIVCDWFSSSRKVTRSLLAEIIIDYEQATSVRAAAKSFMELVGAWPLQMIVYDM…
>PxylGr19
MVDDDNKRIGRTKVSKAKKIKDVFFAMQPAIFAECLFCVSRISKTNGEVGPTKTKFKLLGVFATSFYFTIITIYIVNNIHKVGDGNDSWVYKVSFFPSIVFIVGYIIFVNLNHFVHCNCNLEIYVAFKEIDTLLNINTNNNFYCKCFKQNVMIISIVFISHTLYHVSECLFLTASFHWALVWPAYFFHDLEMCILCSLICMTKSRLNLINERLKHIIHGSKLNDENVSITTCVYSVYLREEQCNARMSEIKELALAYNMIGQLYLKINQVFNFIMLLGLIGAFSYVVITTWSTLYYYRLGGPIYATMSLLSKTVWVINESISTFIICIVCDWFSSARTVTRSLLAEIIIDYEQATSVRAAAKSFMELVGAWPLQMIVYDMFPVDISLILKFVSTCTTYL…
>PxylGr20
MADATGLDVFHTIQPVMFIEYLFAVGRLFKRKGEIKTANIYFKVFGIIYVIVQIILMYILVEIHSNDVGLDMIYDMHFTPTVTIVIGYVMFVINNNFISGNRNMQMYLRFKKIDKELNIHFNRDFYRTSRRQHFLILIILFISHSIYHIIEVTLDSANFAIIWGVYFFQDIEKAFFCILIFMIKKRLDIINLHIAKCINVHRLRKADSSLNGIKFNRFDPILSKKLKISELATVYNSIGELCSLINDDFNLNIFFGFMGAFSYVITSIWSVLYYSRPGIHVYKTITLINQLIWIILELYPIVVVCLVSNWLPWTQKKIKVLLNEIIIDYTTPDTIRNEAKSFNELVDVWPLHIFMYKMFRIDVGLLLNFVNLCTTYLIFMLQITHFI
>PxylGr21
MEVVVTHNEANTKSKPKISKSVLSTLQPIMSIEKAFAMCRYKVNGEDIIKADVKAKVIGILVSSIFIVLLFQFSNSFTLSTEQGVVNIIDNIPSFLVIFEYLVVVNITSFKCSEVNASIVSIIIVIDKYFHINMNESFYRRARSYSYLFLCVLFSCHIIFHFNECMMEWESVNRFITWPFYLFQDLEVVFLCRLLCIVKTRLDIVNNLLEKIYHKHDIRKCKLFTISKVSYISNPVINRKVEIKELAAMYNLIGETCSLMNKVFNFSMFMALVCAFSNVVVTVWTTLYYSRKLRESVTGSLVISATWTFSGICTISSMSIACEILRNTRKKTKILLNEIIMDYSLTREVRAEAKSFMELTDAWPLEFIVYDMVSVDVTLILKFISICTTYLVVSIQMMK…
>PxylGr22
MNNIINDRKDGPKLDDKQSFGLIHALNPILILGKILGDWRFRVQDGKIVPVNNFQRLYVFTTTAVIFLMFCYIIYFHKDMDLLQYVDDIPSVIVVIEYAYYNNFAINFQSQFNIHIFETFDKIDKLLHINMNRSFHVRAKKQAITFLLLLLLVHTVCNSFESVFTPDNIFVMILKLVLYFYQDLEVLMSCMLVLNTASRLSVINEYLEKLIKEKNNTNIFTITEQNKGKKNRTDSTRKIPIRDLAISYDAIGEICTFINGVSNYQILMTLITTFAYVVIAIWTTVYYYRQKQDISESIVMMTIWIVSGMMPICFLGIVCDKLTTRRRETQVLVNDIIMESSFPKAFRSQAKTFMQLIEAWPLEMYVYDMFAIDLQLILKFSSVCTTYMIIIIQISHFTNT
>PxylGr23
MDSGINVSKMNSFTYDRKDHKDGPIFDDNKQSFGLIHALNPIFNLEKIMGVWRFRVEAGKIVPVNNFQRLYVLTTTAIIFLMFSYVMYFHKDLDLLQYVDDIPSVTVMIEYAYYNNFAINFLSQSNIQIFETFDKIDKLLYINMNRSFHERAKKQAITSFLSLLLVHAISHSFEYVFTPDGIFVMSLKLILYLYQDLEVIMTCILVLNTISRLSAINEHLGKFTEEKNNTYIFTIKEHNKVRKNQTDSTRKIPIRDLAITYDAIGEICSSINGVSNYEIFMKLITTFSFVIIAIWTTVYQYRQKQDISETIATITVWIVSGMMPICFLGIVCDKLITTRRETQVLVNEIIMESSLPKAFRLQAKTFMQLIEAWPLEMYVYDMFAIDKQLILKFSSVCTT…
>PxylGr29
MCVLQLESEIIGPTMNKIKDIRKDEIKVDVKHSFGLIHALNTILNVEKILGVWRFRIKGDKIGPSTIFARLYVFTASAIILLVFCYIINYHMDFDMLSYIDDIPGATVIVEYVYHNNIGVNIQSHLHIHIFETFDKIDKILHINVNTSYYKKAENQAVTIALMLLLEHSICNVLEYVLTPDAIIVMNWKWILYFYQDFEVIVFCILVLNVKSRLRAVNEYLKKFIKDQNNVNFNVFTITEVNRQKNLQTKLNLVKKIPLKELAITYDAIGELCSSINQVSNYQIFMTLITTFFYVVMAIWTTIYQYRLNRDVSASVVMTIVWVASGMVAIVAIGIVCDRLMTARRDTIVLVNEIIMDSSLPKALRGQAKMFMQLIEAWPLEMYIYDMFAIDLKLILKFS…
>PxylGr30
MFFLLNKMVKNTFNNSTNSDLGEIFKPMYILLSIVGLFPYSITFNKSKKQFTTQPNSLYFNLLPAVTGATTSCVFFCLHLHHVSQAGLEGNLSEAVVTTTNYCTELVLSLLCCVAPYCCSVLRRRAPAAMLDRVAAAWAAAPFHLASTILPQLQHNINISVAAVVFHLIVHTVIIGALNTDLWKKVLLIFSFNFPHFIQCVFVAYLNVMALLIVSVLQNIRETVAVHAKESAALGLRKAMSAPLNVRHLEETYSEAHRALAELNRCYQGPILFTLLQCFHSILSNSHIIYYGIMMQKDFNVLDGIDCGVWIVWQILKIYVLGRAGSLLNIEIQHFSTQIRFKKMILTVYGYFPVDSTLLFNMVTAAMMYLLILVQFDIPENNPSQELHGTP
>PxylGr31
MLRNNEVHYLKTNEDVTVEDVFGAARRVLTAVGLHPGVAFAGRRRQYRRAARGAPLLAAPLALALLLALAALRVRAALRAADADDRLSGMNYILELCFGMLLNFLIYASAFIHADRHVRVLNTVSAAWTELPFVPNSQITNSIRYNIKRRGFLGLAAVTAAHILLISTEVESQDTVIVNTLSIFGVFIQYLMIVHFYCLIQLAISILQNITENAAHFMNLKKSVLGNNDCWSEDWEGKSGTTLSRLEVNYSKAYVAVAEVNACFQLPALASTVQAFHAMVGEAHALYHGVVVDHDVGPQKAIIIFCTVLSQVFKIYLLGHIGSILKDEIQHFSNQIQFEEMELTVYGYFPLDATLLYNIITAAMMYLIIFVQFDSDA
>PxylGr32
MFTKIKRYLRRFYKQKSNISIKEILQPMSYIILFFGLMPYSLTYNEREQNFTIVKKSWIKRLSLSICNVAFFTVFHFYHTYLYIAAQSHNETGYDFYSFFNYLLQGILGYSSCLTYYVEVYRHREASVAMLRALCAAWREARGEARRGAAPRGSETPGRMLLNVYVILLLLLLISSLRFTLLSITVKSQGSILLLFFKYAPLYLETISFVILAHIYVIMLLLVTTLMLMKETVLSVARQDGGPALSDAARAGRVVAALRPLRRAHASAHRCLALLNRCFQGTIILCFMQAFVTSIATMHIIFQDVLYNFTVLDWYNRVLTVVWFLFLLLKVYVLGHAGQLIEKEIQHFAKHMSCRKMRISIFGYFPLRSNVLFNV
>PxylGr33
MFFWLNKMVKNTFNNSTNSDLGEIFRPMYILLSIVGLFPYSITFNKSKRQFTTQPNSLYFNLLPAVTGATTSCVFFCLHLHHVSHAGLESNLSEAVVTTTNYCTELVLSLLCCVAPYCCSVQRRHAPAAMLNXXXXXAPPAAVLTGVAAAWAAAPFHLASTILPQLQHNINISVAAVVLHLIVHTVIIGALNTDLWKKVLLIFSFNFPHFIQCVFVAYLNVMVLLIVSVLQNIRETVVAYARESVVLGLRKAMSSPLNVRHLEETYSEAHRALAELNRCYQGPILFTLLQCFHSILSNSHIIYYGIMMQKDFNVLDGIDCGVWIVWQILKIYVLGRAGSLLDIEIQHFSTQIRFKKMILTVYGYFPVDSTLLFNMVTAAMMYLLILVQFDIPENNPSQE…
>PxylGr34
MLARFKKNTKEKSEQNVVEAVSMSATVFINAWGSCVLYRRCLLGRVTRHFSTIGFLVWILRLVTFFYLTYIVFKEDQSIVRSFVTTKLHHYGDHYESITAIVFITYLFWKLPFDLNGATEYYQILVDIDEELKTLGEEADYVTQGRCSLFLMILQVVVSFLHATSTYGTLCFIDEHVPLPKVFTLTFIDTCSLLLTATYCNYVSMVTRRYRRVNQILSEIIELESLHNKVYVLNQNFVEENGARCLLKSRDNQLRATVRKCADIHSKLYKATQMANQKFGPALVFIFILPLTYIILNLFYFVEATSQGLLFRDLKRYLSFVMYISWAVVHNWLVIYLSVRFSEDTVLEV
>PxylGr35
MIMIMPKTKKSTPKKVITKIPEIISKQTVLVLQLIGISVFEVYYDKSGKLAKRVSYLGIFGSLFWLGSFGFSAIHACVNDHTILRAYYDTKLKNYGDAYERITSLLYSETVILKVALQVSSCLPFTQYIVDIDKTLASRGVKVDYQHKKTFFITTLQLIPVVLRALTICATLWAIDAVIPVDRIFQLTLTDGVSLMATTFYCHYLYLLMDRYKHINEILSGVKEEATRKVRIDAATIILENDLNIENARRAEDFCERIRLSSKVHSMLFKATATVNEVFGMILLVTSLLPLSYIILNMFYFMEATSAGLAHDVKRYVNFLLYIAWAVLYNVLVIFMNVYFSESTVSEV
>PxylGr36
MNKINKSGGNIKRKKLEVISKPTRTVLKLYGVGVFEVQFDKSGKLVRGVSSLGIFCIIFWIGTFYFSAIYACVKDHTILRAYYETKLKHYGDAYERITSMMFFKTTLFKVAWHINGNVSFIQAILDIDKALESHGVKADYKHKKTFILTLAQLIPVFLRGLTICATLWAIDAVIPYDRVYQLVLTDSVALMVTTFYCHYLNLLTDRYKQINEILTSVKEEAMTKVHMDAGIPIISENGYLKLENTRKADGCERIRLSCKVHSMLYKSTVAVNEVFGMILMLTLLLPLSYIILNMFYFMEATSAGLTHDIKRYMNFLLYIAWAVVYNVLAIFLNVYFSESTVAEV
>PxylGr37
SQVVSTCDVLVVAATAGAGVYGAPARMRSMLRYMESVASLDVSLGAQYSSVSERKLCAVLLSVLFLFSVLIVDDFCFYARQASRFDRTWDVVTNYIGFYLLWFVVVILELQFAFTALSVRARFRAVNDALAHTASCVAVPLEKVKEAHHMNMFAIRVAPADSTRPTNVSLLVDSMSPQDHTVIIRNAVSGEPRLAVPPCEAVRRLGALHGSLCEVIQRVDCSYALPLVVILISTLLHLIVTPYFLIMEIIVSTNRVHFLVLQFLWCAMHMLRMFVVVEPCHYTITEGKRTEELVCRLMTHAPSTGVLPSRLELFSRQLMLRSVQYSPLGMCILDRPLVASVIGAVTTYLVILIQFQRYDN
>PxylGr38
MSLVVWACDLSCIAAACFAGAATAPARVKQMLMVIREVDSINAALNSDLNERSERKKKALCVLIVAALLLLFVLDFRHMTEEAYNEGREWRISFFYLSFYCLYIIMFILELQFVLAVAHVNCALRAVNDALGRELRDMEYIEVQAPIDRPRKSINLLIDSLAVTESSSYTVKPSSNACLIRRLSQLHGAAAAAARALDRGWGPVLFLITANLVLHLVETPYYVITDMFQINGVEPTFLMIQLMWCFTHTINMYGVIEPCHTTVVEVNAMYGFPLHICLCSQMSETRELVSQLLRRADSPSDALRRQLALFAEQLMLSRAEYAPLGVVTLHRPLIATVSL
>PxylGr39
HLPVLTCYIGLAVDLAVGAERGIRAQSRLTYLVWAADVSCVSATALAGVWSGPRRVRQMIAAFNDMDKINRDLGIKWNGTDDRKRKIVVVCVLVFMTLLLTFDFKHITEEASNDGRECXINLIYLPFFIMYLFKFLLELQFILAVTHVNSSLRAINHALEEELNSLDTRSKVDFFRVVLTNEVNPKRRRGIIIIHMIIVFFHCIFSLYSSEVIQVEQLQXLRHLARCHGCVSDATLALNHANGPILFFIVVNLLLHLINTPYYLITDILKFEGVKISFLFIQICWCIVHTTNMCAVIEPCHVTIVEMQSTRQIVSQLLRRADSPSDALHRQLALFAEQLMLSRAEYATLGVTTLHRPLIATILGGVTTYLVIIIQFQQLSG
>PxylGr40
YLSVLTCYIGLAVDLAVGAERGIRAQSRLTYLVWAAGVTCVSATAPAGVWSGPSRVRQMIAAFNDMDKINRDLGIKWNETDDRKRKIVVVCVLVFMTLLLTFDFKHITEEASNDGREC
>PxylGr41
MKTYKVCPDFNLLYESFSPQFPMIKGQPQKGLAHKTRQVRAALFSAAPPKPHGSPKECFVRDSMAFVLLLACVGGVAPVRVGRRGGRWTVAGSRGMRAYGCFVVPAMGKILVVDCGGKQCPSMVYLVWIGNMVLASAAVLAGWRSAGERIRQMVKSFHDMEKINQDLGFEEKRSKDWKRLLFCILLQTAATTLLAYMYKRFSQNNVRERRTKVGYSPLLVMQWLVFLLAQQFSLSVMHVNSSLSAINSALEQELRTLDQQSNYTKLPMYIFCNTLYNLPIFPANFTKFSRSCGWVRRLARHHGWVCDAADSLDHTYGTFLYFAFGNFLLYLIAKPYYLLHDVIEVGFVEFSVIALQMSWVGLYLLTIMAVIEPCHDMAMRLTRSLAAELSRRAGCPLLQ…
>PxylGr42
MSLVVWACDLSCIAAACLAGAATAPARVKQMLVVIREVDSINAALNSDLNERGERKKKALCVLIVAALLLLFVLDFRHMTEEAYNEGREWRISFFYLSFYCLYIIMFILELQFVLAVAHVNCALRAVNDALARELRDMEYIEFQAPFDHPRKSINLLIDSLSVTESSTYTVKPPTSNAIHIRRLSQLHGAAAAAARALDRGWGPVLFLITANLVLHLVETPYYVITDMFQINGVEPTFLMIQLMWCFTHTINMYGVIEPCHTTVVEVSLHIMSETRELVSQLLRRADSPSDALRRQLALFAEQLMLSRAEYAPLGVVTLHRPLIATVSL
>PxylGr43
MKTYKVCPDFNLLYESFSPQYPMIKGHPQKLAHKTRQVRAALFSAAPPKPHGSPKQCFVRDSMAFVLLLASVGGVAPVRVGRRGGRWTVAGSRGMRAYGCFVVPAMGKILVHGVPGVDRQHGAGFSRRAAWGAARRVRPPAGVLAGWRSAAERIRQMVKSFHDMEKINQDLGFVEKRSKDWKRLLFCILLQTAATTLLAYMYKRFSQNNVREKRTKVGYSPLLVMQWLVFLLAQQFSLSVMHVNSSLSAINSALEQELRTLDQQNEKNQTIAIAITFEPYLTPSFALKLGRNFLLLLPHNDLYISPANFTKFSRSCGWVRRLARPHGWVCDAADSLDHTYGTFLYFAFGNFLLYLIAKPYYLLHDVIEVGFVEFSVIALQMSWVGLYLLTIMAVIEPCH…
>PxylGr44
FQDFLSVTLAVFRFARWFGIPTYGAAGAALWCVFQLSTLVAIELGALYKVGRLISGIAICTAGGRYIVGRLSGTIFYGNALVSFILSWKLVANWKPIANYWAMTEHSTALYIPPDLNLKKHLTIILWIVVVSSIVEHSLSMMSATGFSIPASEYFQKYILTSHGFLLRPDEYSLWLAVPIFVCSKTATCLWNFQDTVIILMSAGLASRYRRLNQVVEMQVKRDVEAMGVVAWRRIREAFVRQAALVRRIDRALGGLILLSNLNNFYFICLQFYLGI
>PxylGr45
MPSNIKKTAEQNIKNSPAIKTLLSIEKIFGVFRNLKYSKLNPILRLYSIVLIISLSCVPFIVFKYNIALYQYARRMNIVVTSINSAIYITFCTLKSKSFADLLSGLNKTHVKISRLCQRYTARLKCLHRIIVGCFCSLAAIVSCFVIKQLVDDIMRAQGFSYQILIIQLIIIANLLRGTSQHLMYYSILSIMSYQLEYLKDFGMKNEILLLLTYENRKSTITVDEQDVEVTTLKSWYRDYLNIVTCSTKTNDAFGTAVGIGINVLRILLMLSMLMPFSVPLLLISSAGQRVHNNADENIRALVKLLNRAQPGNICDANFSTLRRLTAATSTHRVTITLFGSVRVGHALLPGAFAFLATYLINGLQFNSIL
>PxylGr46
MHLIKGLTLLLFCENVLGIFRNITSRSNINVLKCIYAAFLVCVLVAGNTTFQVLSNTCASARIHSFLTTLGSILSIIWGCSKSNAFAKLIAYLKLTHEFLKRHKEYVSRLEKLTSVIVILVMFFTVANFTVSIYIYNTRFGYLNINNVYVYYFLNIVLLSSLLRCAGLYMMYYTILTIVAEQLEFVRLESKIHVSNLLGSRANDTESNRYIKLYHRDDVEPKSCTEWFAPYTHICECGELINIIFSFPVIFGIKLDQLMLYGLMLLPNLLALGLISRAGQRVHNDAELFRRALAQLLQRTKPGEAHYKAMRRVVGVASARPIRVVMFGSLRVGHVLLPTSLAFFTSYLIIALQFNNVV
>PxylGr47
MYKSIDRNIKYLAPIKSVLLAEYFFGVFRNNAPSTKYLQLLYTSINIFVLCYFNVIAFISSNPLYKKMENAEKIYLMVITTESISIMIFSIFKSKSFACLMSSINKNHVRMGHCDTYNQHLKFLHRRVTISVVVSVLYLTKITIDVLMHSYSDLHGHVHILMTINGCRWFFQNLMYYNVLTILSHQLANLKDNGFKNRNPNFILHRKAKNPTTIEKIEERDVAIPTLSDRYRTYFNIVESSVITNNVFGTPGPNLGRTAAFIFFMTPFLTSLLLISRAGQRLHNNADTNVRAVVQLLSRARPENENFATLRKIASATSTHRVSITLFGSVRVGHALLPSAFTMLSNYLITGLQFNNLL
>PxylGr48
MKKTIEQNINTPSAIKSLIAIDKAFGVYRNLNHSKLHLIFRLNSMIFIILLCCVPYMVYTYDISIDEYNKSNANTSATVNLGVTCVNSLIYILFSSLRSKSFSALLSSLNKTHEAMSSRCLRYNGRLKFLHRITVGSVSFLVAIILCYNIISYITGLEQVFTYQGFIVQIVLSTNLLRGTTQYLMYYSVLSIMSHQLEYLKEFGLKNDILLLNMYKQGKCTIATDERDVEIKTLKSWYRHYVNIVKCSKKTNDVFETPGINSGRLVFMFSVLMTFLVPILQISRAGQRVHDNADGNRRALVKLLNRAQPADANFPILRRLTDVTCTQRVTITLFGSVRVGHALLPGAFAFLATYLINGLQFNSIL
>PxylGr49
MKKTVEQNINTPSAIKSLIAIDKALGVYRNLKYSKFNLIFRLYSIIFIILLCCVPYMVYRYDISIDEYNKSDANASATINLGVTCVISLMYILFSSLRSKSFSALLSSLNKTHEAMSSRCLRYNGRLKFLHKITVGSVSFLVAIMLCFIIISYITAFEQVFTYQGFIVQIVLSTNLLRGTTQYLMYYSVLSVLSHQLEYLKEFGLKNDILLLNMYKQGKCTIAIDERDVEIKTLKSWYRHYVNIVKCSKKTNDVFGTPGSNTGRLVMMFSVLMTFLVPILLISRAGQRVHDNADGNRRALVKLLNRAQPADANFPILRRLTDVTCTQRVTITLFGSVRVGHALLPGAFAFLATYLINGLQFNSIL
>PxylGr50
MVAPAEYLLNNNVDSEIQQVIKPLAFTNELSFSSKFNLRDNFITPNSKVYIVISVFANVFFVSVHLTQLFLELANRQASTARVFILIVDKSTITLEFVSNLFIGVFRSHLVVLILLKVQEIGRHLVVLDQDKREYRPFIWGLIFATMICQLVTALSNMIIAPQQSIITQFQDLVFTSSRFFYDINMIYPIYFIDFLSNNLKIWSKHVEKFANFKVEENITRDKETPDLEKLFETYRLVFKVLKIIEKVFGLAVNQVILNFQDYTGTEMIYLIVVRYMCWVMKIFTLIIILSTKCECLDTNIRNANTTTLIVLKCNKDLSRFCKNVLRVSGCEYDAWSACGLFTVDARLPLRVIGVVATYTVVLLQFALL
>PxylGr51
MSSSFQSTNHNNYLSNEFLKIIKPLYITDCVIISNKFRLKRNCITPNTKLYSFFSILANISFVSLHFIRNFVTGTLEEKYFAIGFVFIANIVLVVIEYIVNVTSGILRSESIVDILLKLQSIDDILQYKEIKQFEKFKKWTHGLLFGVLALQTFIATSNARFFVGESVLELFLSFNRFFFDTHLIYSVFIVDFLTSKLNLWSSKLEAIADAPQHVSSSDLDDRVDRDILFSTFRCILRVVQLTEQVFSWHVTLIYYLLFQSQINMDLFTLAIVRYFFWTSKIIFFIIIICVKREIFHTKFLHVRSVILSVLSRSHDVQKLCKNVLRVSACEYGSWSACGLFTVDARLPLRVIGVVATYTVVLLQFALL
>PxylGr52
MVVSMELLLNNYVSKELQHILKPLIVVNRCILSSRFQIKDSFIMSNSKTFLFLSFLVHVGLIGFICTTNNDISTYFNYQIISLSVMVCVALLSVVTEFILNFIGVVTEGSSVIKIILSIQKIDKKLHNNSLKVFKEDKKVVWGLFCLLMTFHLTATISTEMLYRRGAADFIFNIIRVAYDINMIYAIFILNFTITRLIIWRSKVESLTASSNILNNKDPQLSLTESIDILADIFRRLLEIIELANTAFSLPCLNSNFFQVENDPDFIFNSIIHFVASISKIAIALILVCAKCNILYSEIKAAKRVVLRTLRKSENVHRLCKNVLRVSACEYGAWSACGLFTVDARLPLRVIGVVATYTVVLLQFALL
>PxylGr53
MFLFKEIQKVVKPLTITDSIFFSSKFCCKGTSIVPNSRIYKIVSMFANTIFITLHCLRINLTEIKKYDIDFLNTLVVLNLTSIILEYMVNFLSGVLKSEYVVRIMQNIENIDRKLKINSLELKESKLLVRAVFMFSVSCQILTATSNYFVFGQTSILQFCITSCRFSLDVNIIYSVFFVHYATNRLNKWIVKVKDVSINSALVPVEVPTMANISKDTETMLKVFRSVISILKLTEKVFGLPEPHTPGHIFMSIFHFFTWVFKLFILLTLLCVKCEVFNTTMAKANAVCLNVLKNSKDEEIRRFCKNVLRVSACEYEAWSACGLFTVDARLPLRVIGVVATYTVVLLQFALL
>PxylGr54
MSAQVGYLPNNHVNSEIHQVIYPLAFINKLCFSSKFNLKDKFVTPNTKIYIFFSVIINISFVSVHLYGLYLGLNTYSGFSTRYLVTLVDKTVISLEFVTNLFCGITKSHLVVEILLKAQKIGRKLKTLNIKTKEYRPLIWGLIGVTMSCQLVVALSNMIIEPQLSIITQFLDVVFTCTRVYYDINIIYPIFFIDLLSKNLKIWAEHVKKFGNFTTLVKRLNPVKAEEQELNILFETYNLIFEVRKIIENVFGVAVSFKAIELSDSEIIYLAVIRYVCSIMKIFTLIIIVSSKCQCLNNNIRLANTTNLIVLKSTQELALSRFCKNVLRVSACECGAWSACGLFAVDARLPLRVIGVVATYTVVLLQFALL
>PxylGr55
MSQNKINVFRTKDQLHILKPLLLFLFLFGFNYFNFKTRLYRILSYLYISALYITLIITASYTYKLRAESTMWIALEYLASSVAVLLTHKYTISFFHELKKIDPKLRLPRKYYKCTSYGLIGGIVLVGILRVIYIAIYCYVYDCVKYIQLYLVFFFALTALDLHRFWRLALCCIVKMRLQIIRLKLEDDPNNNIYLYVDKNKTLLGNKLKVLLELYKQFAEAVELVNREIHASVFICVVCSLPKLISYVYSIFLVFEGHAVYITFEFISVHVLQVCLYLFLPFVVSEGYSIEIEKIQLILMNKLIKETEDIDLFLRYMEVKNFKYKVWRIMPLSITFPLELINICTTYVIVLINFTHLYD
>PxylGr56
MSQNKINVFRTKDQLHILKPLLIFLFIFGFNYFNFKTRLYKILSYLYISALYITLIITASYTYKLRAESTMWIALEYLASSVAVLLTHKYTISFFHELKKIDPKLRLPRKYYKCTSYGLIGGIVLVGILRVIYIAIYCYVYDCVKYIQLYLVFFFALTALDLHRFWRLALCCIVKMRLQIIRLKLEDDPNNNIYLYVDENKTLLGNKLKVLLELYKEFAEAVELVNREIHASVFICVVCSLPKLISYVYSIFLVFEGHAVYITFEFISVHVLQVCLYLFLPFVVSEGYSIEIEKIQLILMNKLIKETDKSTKEDIDLFLRYIDVKNFKYKVWRIMPLSITFPLELINICTTYVIVLINFTHLYD
>PxylGr57
MVVSMELLLNNYVSKELQHILKPLIVVNRCILSSRFQIKDSFIMSNSKTFLFLSFLAHVGLIGFICSTNNDISTYFNYQIISLSVMVCVALLSVVTEFILNFIGVVTEGSSVIKIILSIQKIDKKLHNNSLKVFKEDKKVVWGLFCLLMTFHLTATISTEMLYRRGAADFIFNIIRVAYDINMIYAIFILNFTITRLIIWRSKVESLKASSNILNKDLQLSLTXSIDILADIFRRLLEIIELANTAFSLPCLNSNFFQVENDPDFIFNSIIHFVASISKIAIALILVCAKCNILYSEIKAAKRVVLRTLRKSETEEVHRLCKNVLRVSACEYGAWSACGLFTVDARLPLRVIGVVATYTVVLLQFALL
>PxylGr58
MFLFKEIQNVVKPLTITDSIFFSSKFCCKGTSIVPNSRIYKIVSMFANTIFITLHCLRINLTEIKKYDIDFLNTLVVLNLTSIILEYMVNFFSGVLKSDYVVHIMQNIENIDRKLKINSLELKESKLLVRAVFMFSVSCQILTATSNYFVFGQTSILQFCITSCRFSLDVNIIYSVFFVHYATNRLNKWIVKVKDVCINSALVPVEVPTMANISKETETMLKVFRSVISILKLTEKVFGLPEPHTPGHIFMSIFHFFTWVFKLFILLTLLCVKCEVFNTTMAKANAVCLNVLKKSKDEEIRRFCKNVLRVSACEYEAWSACGLFTVDARLPLRVIGVVATYTVVLLQFALL
>PxylGr59
MSSSFQSTSRNNYLSNELLKIIKPLYITDCVIISNKFRLKRNCITPNTKLYSFFSILANISFVSLHFIRNFVTGTLEEKYFAIGFVFIANIVLVVIEYIVNVASGILRSESIVDLLLKLQSIDDILQDKEINKFERFKRWTHGLLFSVLALQTFIATSNARFFVGGSVLELFLSFNRFFFDTHLIYSVFIVDFLTSKLNLWSSKLEALADAPNHVSSSDLDDRVDRDILFSTFRCILRVVQLTEQVFSWHVTLTYYLLFQSQINMDLFTLAIVRYFFWTSKIIIFIIIICVKREIFHTKFLHVRSVILSVLSRSHDVQKLCKNVLRVSACEYGSWSACGLFTVDARLPLRVIGVVATYTVVLLQFALL
>PxylGr60
MSAQVEYLPNNHVNREIHQVIYPLATINKLCFSSKFNLKHKFVTPNTKIYIFFSVIINISFVSVHLYGLYLGLNTYSGFSTRYLVTLVDKSVISLEFVTNLFCGITKSHLVVEILLKAQKIGRKLKTLNIKTKEYIPLIWGLIGVTMSCQLVVALSNMIIEPQLSIITQFLDVVFTCARVYYDINIIYPIFFIDFLSKNLKVWSEHVKKFGNLPIPERNLNPVNAEEQELNMLFETYNLIFEVRKIIENVFGVAVSLKLLYYYELSDSELIYLAVIRYVCSIMKIFTLIIIVSSKCQCLNNNIRLANTTTLIVLKSTQELALSRFCKNVLRVSACECGAWSACGLFTVDARLPLRVIGVVATYTVVLLQFALL
>PxylGr61
MCQISNVGRLKMAASSSGEYLIDNHIDPELLQILKPLNLFQSLFLVPRYRVRDNFVTPHSPKFKLLSYLVAISTFSLYCLSISQFVFNYIIIAINIICRVVCCIGHVILILLNGQQSDLNVMLLRKLQEVIKKLKCSEVYSGLARNNWLLLITNTLVSTAFLCYSVHTRVLLKNLYLGMILIFDVHMIYAVCILKIMVRVFARFIGNVEGFLQHRIDSKPKEIECNEILKTFRQILHIYDMYQKIFQAAQRKLGKNILRVSRTFQKLSACGLFAVQPALLLRLCGGLLTLTLMLLQLVLL
>PxylGr62
MSSTSSKVEYLIDNHIDPELVQILKPLNLFQSLMLVPRYRVRDNFITPHSPRFKIFSYLVAVFTIIMYSISIRQYFFDYFFLAINILFRIVCCFSHVILIVLNGQQSGLNVMMLRKLQEVIKKLKCSEVYSGLARNNWLLLISYFFVTIYYLCSRAYSGKSLRNVYLGMIVIFDLHMIYAVCILNIMVRVFAYWIRNIEEFLKDPFTECNENDCNDYMRTFRMILQIYQMFQKLFQASKRKRGKNILRVSRTVQKLSACGLFAGQPALLLRLCRGLLTLTLMLLQLVLL
>PxylGr63
MSAWSSKVEYLIDNHIDPELLQVLKPLNLFQTLMLVPRYRVRDNFVTPHSPRFKFFSYLVAMFTMILYCVSIYQNIITVKQAINIIFRIVCCISHVVLILLNVQHSDLNVILLRKLQEVIKTLKCSEVYSGLARNNCLLLITYFLFNVLFLWSIVYSGSFLRNFYLGMVLIIDIHMIYGLCILNIMVRVFAHWIRSIEKFLQDPIAVRIENECCEYVTTFRTILQIYHMFQKLFQVAQRKLGKNILRVSRTFQKLSACGLFAVHGAVSACGLFAVQPALLLRLCGVLLTLTLMLLQLVLL
>PxylGr64
MASEFLATNILEDGFMKSFAPILFCQKLFFSGRTNFEYRFASGPTKRQRILTVIALILIICLFNYSRFSYIMNYETVISNDKFLFALNQASTSVYMIAMIASVIQARFFDFNKASEFYMKLQEIGNIMKMRRSKARSYAMGYHRSIATVCILIVFASAFMYSSQWYNYNLTLMMSCICWATATFCLELALCLHTGIDLIAKLKYLNGILKSECAALVSPRGGRGGRGGRGGWWYPRDALVQRWVLEDKRALSDSDVTLYLKEIFKGYKMFSDVFKFQRLPAYYIASVSMGIIINFILISAIGLLGGTFESEVKTTKYISNKILTLYSEGPIRKKVKTLISMIENNTPVFSIYGIWTANYGIIVRLFSITTTYLVVLLQLSYL
>PxylGr65
MTCEYLSEDILQANFFKCTSPVYYAQLLCGTNRVDIRDNFATPVTKGQKLYSLLIIFGVTLSYSYFAFNYYELYSVTSPTILYMSIVGMVLHYTTYLFNQCFLRLTKQTDNIRLVVLLNKIDCLLNINHESDINNLQYYWSATAVFLTALVFFFGYGVHVVGTVPQYPVFTCFISIQLYSYLLEIICIGAYVYYVAVRMRLCSYLIRSMVSKLLSKYDCGDAVEVSHRVELRNVTVCLSYILEAFRTIEKIFRYSVSQLRTVLKQITNMIEWEKPEFSIYGVFKLDLSLTLKLISIVAYYFIVFMQITMEL
>PxylGr66
MKCEYLSEDILQASFVKCISPVYYAQLFCGTNRIDIRDNFATPATKGQKLYSCLIILCTTLSYLYYGFSYYQQYSEISPYISYMAITCMVLHYTTYLIDQSLLRLNDQRDFINLVISLQKIDFLLDITHESNINDPQYRFSAVVVPVMAICLSLGFAVHMIYTVRHYPIFVFFIWVELFGQMIEIFCVCNYIYYITVRMRRLYILLQMRLSYFMAERKFEDEALRNAYQVKLRNDIVCLRNIFDAFKAVAKIFRYQVRQRRSVLKQIINTIDWEKPEFDIYGMFKLDLSLGVKLIALVIYNFFVFMQLTLQL
>PxylGr67
MASEFLATNILEDGFMKSFAPILFCQKLFFSGRTNFEYHFASGPSKRQRILTVIGLIIINCLYNYSRVTYVMNYEHVIVNDKLLFALNQASTSVYMFAMVASVTQARFFDHNKASDFYMKLQEIGNIMKMRRSKARLYTMAYHRSIATVCSLCVFVFTFMYPSQWYNYNLSIMMACVCWATGAFLMELTLCLQTGVDLIAKLKYLNGILKSECAALVSPRGGRGGRGGRGGCWYPRDALVQRWVLEDKRALSDSDVTLYLKEIFKGYKMFGDVFKFQRLPVYYLASISAGMVVNFSFVCAIGLLGGTFAKEVKNTKYTSTKILMLYSEGPTRKKVKTLIRMIEHNTPVFSIYGIWTADYDLIVRLFSVTTTSLVVLLQLSY
>PxylGr68
MKTYKVCPDFNLLYESFSPHFPMIKGHPQKGLAHKTRQVRAALFSAAPPKPHGSPKECFVRDSMAFVLLLACVGGVAPVRVGRRGGRWTVAGSRGMRAYGCFVVPAMGKILVHGVPRVDRQHGAGFSRRAGRLGPPRGAGAGRDSATLTYPIGRFQINQDLGFEEKRSKDWKRLLFCILLQTAATTLLAYMYKRFSQNNVRERRTKVGYSPLLVMQWLVFLLAQQFSLSVMHVNSSLSAINSALEQELRTLDQQSNYTLPPNYVRKIIDDYRRKSWRKIFLTLFGKTLLKMKLSYNFFVLSTPVDAADSLDHTYGTFLYFAFGNFLLYLIAKPYYLLHDVIEVGFVEFSVIALQMSWVGLYLLTIMAVIEPCHDMAMRLTRSLAAELSRRAGCPLLQKS…
>PxylGr69
MASEFLATNILEDGFIKSFAPILFCQKLFFSGRTNFEYRFASGPTKRQRILTVIALILIICLFNYSRFSYIMNYETVISNDKFLFALNQASTSVYMIAMIASVIQARFFDFNKASEFYMKLQEIGNIMKMRRSKARSYAMGYHRSIATVCILIVFASAFMYSSQWYNYNLTLMMSCICWATATFCLELALCLHTGIDLIAKLKYLNGILKSECAALVSPRGGRGGRGGWWSPRDALVQRWVLEDKRALSDSDVTLYLKEIFKGYKMFSDVFKFQ
>PxylGr72
SEMLIVGRLLIGINSGLNAGLAPMYLSEISPVSLRGSIGTVYQLVITITIVLSQVLGLSSVLGTSTRWSLLLALPLLPAALQCAALPFCPDSPHYLLFNKGNDKGATKALSWLRGGAEVNSEMEEMHQEAEKTKIRKKVTVRELFRNRQLRVPLITAAVVMLAQQLSG
>PxylGr73
YGIMMQKDFNVLDGIDCGVWIVWQILKIYVLGRAGSLLHIESRRIGETLHDLPVDKLESRTLLEIQHFSTQIRFKKMILTVYGYFPVDSTLLFNMVTAAMMYLLILVQFDFPEN
>PxGr77
MFERLRRKSTQIVMAKNVVLEKKLQILSDEGGVQGFHRALRLTMLAPRLLGMLPLCGLTCPDSSQLRFRLISPYLPIFIFALFGQLFMITCNLYRMFDIGCSLGTITNCLFYASGCFSTIFMIRIGQRWPDTVQFIEAVERRLPPLPSQVTRQCNGIMIFVLTAALVEHVLCDVYLYKEASACHDGDIWRKYFTDNIPWIYNYIPYSPWKAVVTEMFNIHSTFMWSFNDALVMVCSIYLTHHFLNHNRLLENVMGQETFHLKEFRIQYKNMMNLVNIINKEIGVVIVISFFCNLYWICMQLFNSLNKSDNSDNDFPSVECQQRSIANKSSLEHNMYFAFSFTFLFVKALLVSFLGARIHSNSLVPLSMLFEVSSSNYDIEVQRFIDQVKHSHVAISGLD…
>PxGr78
MLVFSLNYKNDKYAFTYSVYALAWLSVRCFSLLVAASDVHARSRAGADYFKNIQTTSYNTEVRRLQFQLSKNEIALSGMGFFKLKRSLILKVLSVIITYDLILLQYNDNL
>PxGr79
MNSEIREEAMLLSMQLLHQVPRFTANGLFNLDYPLLVEGSRFVTTFMGLLLQFAT
