# Supplementary material for: A gustatory receptor tuned to the steroid plant hormone brassinolide in Plutella xylostella (Lepidoptera: Plutellidae)
Source: eLife. 2020 Dec 11;9:e64114. doi: 10.7554/eLife.64114 (PMC7806260; doi:10.7554/eLife.64114)
Supplement: Figure 2—source data 1. [file elife-64114-fig2-data1.xlsx]

## Sheet: Sheet1
Relative transcript levels of PxylGr34 in each treatment by qPCR
Larval head			Larval thorax (without wing disc, thoracic legs, gut, or other internal tissues)			Larval thoracic leg			Larval abdomen (without gut or other internal tissues)			Larval gut
7.26094	16.5769	28.4904	1.79989	0.434875	0.765238	11.2104	16.8243	8.03723	1.58098	0.320747	1.86208	2.98509	6.76377	5.28119
Female antenna			Male antenna			Female head (without antennae)			Female foreleg (only tarsi and tibia)			Female ovipositor
119.225	311.887	109.471	253.204	154.476	213.496	1.87338	3.38174	3.58007	3.34895	2.95522	3.4062	0.859211	0.915166	1.22562
