# Supplementary material for: A gustatory receptor tuned to the steroid plant hormone brassinolide in Plutella xylostella (Lepidoptera: Plutellidae)
Source: eLife. 2020 Dec 11;9:e64114. doi: 10.7554/eLife.64114 (PMC7806260; doi:10.7554/eLife.64114)
Supplement: Figure 3—source data 1. [file elife-64114-fig3-data1.xlsx]

## Sheet: Sheet1
Response profiles of Xenopus oocytes expressing PxylGr34 in response to ligands at 10−4 M.
Sinigrin	Allyl isothiocyanate	D-Sucrose	D-Fructose	Myo-inositol	L-Alanine	Methyl salicylate	(+/−)-Jasmonic acid	(+/−)-Nicotine	cis-3-Hexenyl salicylate	24-Epibrassinolide	Brassinolide	20-Hydroecdysone	Aristolochic acid	(+/−)-Camphor	(−)-Citronellal	Indole-3-acetic acid	(+/−)-Abscisic acid	Gibberellic acid	Kinetin	Methyl jasmonate	Spermine	Spermidine	Putrescine
0	7.2	0	0	0	0	0	0	0	0	48.8	72.3	0	0	0	0	0	0	0	0	9.9	0	0	0
0	13.6	0	0	0	0	0	0	0	0	45.5	59.4	0	0	0	0	0	0	0	0	14.5	0	0	0
0	4.9	0	0	0	0	0	0	0	0	57.5	85.1	0	0	0	0	0	2.3	0	0	5.3	0	0	0
0	5.6	0	0	0	0	0	0	0	0	79.3	78	0	0	0	0	0	0	0	0	3.7	0	0	0
0	6.4	0	0	0	0	0	0	0	0	78.7	66.8	0	0	0	0	0	0	0	0	7.9	0	0	0
0	6.1	0	0	0	0	0	0	0	0	60.3	87.3	0	0	0	0	0	0	0	0	13.4	0	0	0
0	4.1	0	0	0	0	0	0	0	0	72.5	80.2	0	0	0	0	0	0	0	0	8.6	0	0	0
Response profiles of Xenopus oocytes expressing PxylGr34 in response to BL at a range of concentrations.
10−7 M	10−6 M	10−5 M	3.3*10−5 M	10−4 M	3.3*10−4 M
0	0	4.4	12.7	50.5	113.8
0	0	8.4	14.1	44.3	68.7
0	3.8	7.5	6.4	44.9	84.1
0	0	12.1	14	59.8	157.5
0	0	7.9	30.8	68.8	218.4
0	0	11	19.8	42	243.1
0	0		18.6	86.2	142.7
0	2.1			91.2
