# Supplementary material for: A gustatory receptor tuned to the steroid plant hormone brassinolide in Plutella xylostella (Lepidoptera: Plutellidae)
Source: eLife. 2020 Dec 11;9:e64114. doi: 10.7554/eLife.64114 (PMC7806260; doi:10.7554/eLife.64114)
Supplement: Figure 4—source data 1. [file elife-64114-fig4-data1.xlsx]

## Sheet: Sheet1
Response profiles of the two lateral and medial sensilla styloconica on the maxilla of P. xylostella fourth instar larvae to water and BL at 3.3×10−4 M.
	Lateral sensilla
ddH2O	6	4	0	3	2	1	5	12	3	9	0	8	1	1
BL (3.3*10-4M)	2	3	7	7	5	11	15	8	4	1	10	0	9	7
	Medial sensilla
ddH2O	6	2	9	1	6	5	0	3	0	6	0	0	4	1	3	1
BL (3.3*10-4M)	54	51	46	48	19	83	49	28	29	18	35	21	28	49	34	40
Response profiles of the two lateral and medial sensilla styloconica on the maxilla of P. xylostella fourth instar larvae to water and EBL at 3.3×10−4 M.
	Lateral sensilla
ddH2O	0	3	1	2	4	2	3	1	0	2
EBL (3.3*10-4M)	1	5	3	1	1	4	0	5	2	2
	Medial sensilla
ddH2O	3	4	1	3	0	1	2	0	2	1
EBL (3.3*10-4M)	38	38	60	77	33	27	30	33	64	38
Response profiles of the two lateral and medial sensilla styloconica on the maxilla of P. xylostella fourth instar larvae to water and sinigrin at 3.3×10−4 M.
	Lateral sensilla
ddH2O	2	0	1	1	2	3	3	1	2	1
sinigrin (3.3*10-4M)	0	3	7	9	6	2	1	12	4	1
	Medial sensilla
ddH2O	2	1	0	4	2	3	1	5	0	1
sinigrin (3.3*10-4M)	74	51	40	41	38	46	41	66	78	56
