# Supplementary material for: A gustatory receptor tuned to the steroid plant hormone brassinolide in Plutella xylostella (Lepidoptera: Plutellidae)
Source: eLife. 2020 Dec 11;9:e64114. doi: 10.7554/eLife.64114 (PMC7806260; doi:10.7554/eLife.64114)
Supplement: Figure 5—source data 1. [file elife-64114-fig5-data1.xlsx]

## Sheet: Sheet1
Response profiles of medial sensilla styloconica on maxilla of P. xylostella 4th instar larvae to water and BL at a series of concentrations.
ddH2O	BL (10-6M)	BL (10-5M)	BL (3.3*10-5M)	BL (10-4M)	BL (3.3*10-4M)
8	1	0	1	9	36
1	6	2	1	13	59
8	6	11	15	18	33
2	1	5	2	18	40
4	2	6	16	15	19
5	0	9	7	13	29
0	0	4	4	37	28
1	5	0	3	25	27
0			1	17	48
0			3	15	35
5			15	25
0				20
4				34
3				19
4
4
0
1
4
0
8
4
5
6
0
2
0
0
8
11
