# Supplementary material for: A gustatory receptor tuned to the steroid plant hormone brassinolide in Plutella xylostella (Lepidoptera: Plutellidae)
Source: eLife. 2020 Dec 11;9:e64114. doi: 10.7554/eLife.64114 (PMC7806260; doi:10.7554/eLife.64114)
Supplement: Figure 6—figure supplement 1—source data 1. [file elife-64114-fig6-figsupp1-data1.xlsx]

## Sheet: Sheet1
Total feeding area (mm2) of ddH2O and EBL-treated discs
Control
13.1529	17.0501	11.3667	11.5291	17.7808	19.3235	6.17051	5.76456	16.6441	24.5197	17.6996	54.6415
EBL (10-6M)
23.383	21.7592	23.383	20.9473	8.0379	10.3113	13.4777	15.9134	0.32476	11.5291	10.0677	25.4128
Control
59.032	6.14742	34.8634	15.4107	12.4633	5.38952	13.1369	42.5266	2.94739	45.1372	2.44212	17.1791
EBL (10-5M)
3.20002	16.2528	15.2422	11.0317	43.2003	5.05267	10.9475	40.674	6.14742	19.0317	7.83164	3.62108
Control
34.9943	8.7256	12.9506	50.5167	30.1263	36.9231	18.4615	11.3892	21.4925	18.4615	11.7566	18.3697	16.992	12.7669	33.1942	34.7502	21.1613	67.6332	29.4598	30.3934
EBL (10-4M)
7.71527	18.0942	17.4512	26.4524	6.98048	4.13318	23.5132	12.0322	7.99082	13.2262	23.3295	12.0322	8.63376	22.3192	7.1575	13.2777	7.05377	22.5098	13.2777	3.21569
Control
23.9831	26.0282	25.0986	14.5944	41.831	45.5493	20.1718	48.338	26.307	22.8676	52.2423	19.893	24.3549	27.8873
EBL (10-3M)
15.7099	3.5324	13.9437	20.2648	41.738	18.0338	20.0789	9.48169	21.5662	10.8761	26.0282	16.3606	8.18028	17.0113
Control
12.8012	26.7366	59.4687	25.9264	30.4635	24.7921	18.5536	17.9903	26.1509	30.2312	14.9301	13.8173
EBL (10-2M)
12.3961	12.315	16.6901	7.12976	8.18302	7.45384	7.61588	3.98755	2.22561	9.64431	10.9426	8.34604
