# Supplementary material for: A gustatory receptor tuned to the steroid plant hormone brassinolide in Plutella xylostella (Lepidoptera: Plutellidae)
Source: eLife. 2020 Dec 11;9:e64114. doi: 10.7554/eLife.64114 (PMC7806260; doi:10.7554/eLife.64114)
Supplement: Figure 6—source data 1. [file elife-64114-fig6-data1.xlsx]

## Sheet: Sheet1
Total feeding area (mm2) of ddH2O and BL-treated discs
ddH2O
28.4373	18.2106	12.2899	25.6563	11.1237	9.95753	42.7905	42.8802	14.8017	9.06046	28.7961	17.2238	4.12654	15.1258	23.0716	13.594	15.2215	46.526
BL (10-6M)
22.4269	15.6988	11.034	9.32958	4.39567	7.98397	23.5931	10.6752	8.70163	15.34	12.2899	23.5034	39.8301	19.9124	10.5306	37.9101	6.03116	42.0266
ddH2O
18.9283	19.5562	18.0312	38.5742	11.4826	2.51181	2.51181	17.1341	27.058	11.6093	22.5788	16.18	5.75896	17.4597	26.9666	11.6093	13.8032	26.1439	12.2492	32.6826	33.4675
BL (10-5M)
1.79415	5.92069	18.3003	29.3344	4.93391	21.8886	16.7753	10.3164	31.9028	15.6315	19.0137	4.20496	13.8032	8.68415	23.3101	22.3046	31.4458	6.49026	6.94732	28.6591	37.5174
Control
31.2132	16.4047	20.661	14.0992	21.9025	13.3011	16.6707	11.1729	15.3406	32.8913	24.1259	36.9819	21.538	44.1612	23.8754	23.7919	19.7849	32.2235	38.9019	49.5874	27.1312	26.0459	41.3229	42.9925	46.4901	35.9768	25.0776	21.1231	21.6053	17.9401
BL (10-4M)
13.5671	2.0395	7.53729	6.56187	6.20718	8.69005	8.5127	7.18259	6.8279	8.51501	7.84717	30.053	21.0371	13.9412	9.26633	11.9377	11.5203	14.3587	6.428	21.371	16.2787	15.6943	17.5309	41.7403	4.24391	21.6053	7.61974	5.30488	2.89357	9.64524
Control
47.5345	32.0704	47.886	32.1583	17.5728	21.6146	22.9325	33.1248	47.7103	40.6864	36.5699	18.3807	13.1154	11.167	47.4365	14.9508	17.5349	27.5944	14.9508	14.2125
BL (10-3M)
17.3971	8.96215	6.41409	5.8869	9.40147	6.58981	8.87428	2.1966	8.96215	4.9781	2.01038	2.20185	5.26529	29.9939	4.70674	3.50698	6.64481	6.7371	5.0759	6.82939
Control
47.2632	16.2273	23.1439	22.2572	44.603	52.6724	21.0157	35.4696	19.1536	36.7997	32.9867	19.4196	28.9964	33.9621	30.2378	12.1483	47.8839	30.9472	62.3378
BL (10-2M)
3.28094	4.69972	8.06933	5.94116	9.31077	6.73922	7.62596	8.33535	7.35994	8.24668	9.75414	4.96574	8.33535	7.62596	18.4442	6.73922	7.18259	11.7936	10.5522
