# Supplementary material for: A gustatory receptor tuned to the steroid plant hormone brassinolide in Plutella xylostella (Lepidoptera: Plutellidae)
Source: eLife. 2020 Dec 11;9:e64114. doi: 10.7554/eLife.64114 (PMC7806260; doi:10.7554/eLife.64114)
Supplement: Figure 7—source data 1. [file elife-64114-fig7-data1.xlsx]

## Sheet: Sheet1
Total number of eggs laid by a single mated female on control films and BL-treated films
Control
8	16	20	25	20	19	13	11	13
BL (10-5M)
12	18	7	18	22	11	14	11	17
Control
46	21	14	22	0	15	19	32	11	12	10	21
BL (10-4M)
5	11	12	1	13	4	5	16	8	13	7	11
Control
13	21	12	26	9	20	13	29	36	31	43	14	11
BL (10-3M)
5	0	5	0	2	6	22	5	18	16	11	8	12
Control
33	30	11	17	28	28	18	29
BL (10-2M)
21	7	15	3	0	0	8	12
