# Supplementary material for: A gustatory receptor tuned to the steroid plant hormone brassinolide in Plutella xylostella (Lepidoptera: Plutellidae)
Source: eLife. 2020 Dec 11;9:e64114. doi: 10.7554/eLife.64114 (PMC7806260; doi:10.7554/eLife.64114)
Supplement: Figure 8—source data 1. [file elife-64114-fig8-data1.xlsx]

## Sheet: Sheet1
Relative transcript levels of PxylGr34 in each treatment determined by qPCR
ddH2O			GFP-siRNA			PxylGr34-siRNA
1.23401	1.15426	0.611723	1.1268	0.796413	0.775938	0.206998	0.422608	0.453396
Response profiles of the medial sensilla styloconica on the maxilla of P. xylostella fourth instar larvae with cabbage leaf discs coated with PxylGr34 siRNA, GFP siRNA, or ddH2O, to water and BL at 3.3×10−4 M.
	ddH2O treatment
ddH2O	1	0	2	1	2	0	4	2	1
BL (3.3*10-4M)	82	35	33	35	37	47	37	49	60
	GFP-siRNA treatment
ddH2O	1	0	2	0	0	1	1	2	1	0
BL (3.3*10-4M)	31	58	43	48	46	32	39	31	33	81
	PxylGr34-siRNA treatment
ddH2O	1	2	5	6	3	0	3	7	0	1	1	0
BL (3.3*10-4M)	21	25	13	16	5	16	46	25	5	39	3	5
