# Supplementary material for: A gustatory receptor tuned to the steroid plant hormone brassinolide in Plutella xylostella (Lepidoptera: Plutellidae)
Source: eLife. 2020 Dec 11;9:e64114. doi: 10.7554/eLife.64114 (PMC7806260; doi:10.7554/eLife.64114)
Supplement: Figure 9—source data 1. [file elife-64114-fig9-data1.xlsx]

## Sheet: Sheet1
Total feeding area (mm2) of ddH2O and BL-treated discs using 4th instar larvae fed on cabbage leaf discs treated with PxylGr34 siRNA, GFP siRNA, or ddH2O
	ddH2O treatment
Control	28.9525	10.6011	9.88838	61.5574	40.6225	27.7053	39.8208	21.9148	21.2912	28.0616	30.6451	20.8458	11.2247	18.4405	43.4732	16.6588	15.1444	30.1996	21.8257
BL (10-4M)	9.71021	35.0993	9.35387	6.94859	3.91972	10.6011	24.4092	28.0616	17.8169	11.2247	15.0553	10.1556	27.1708	16.3916	11.0465	7.92852	1.95986	18.0842	7.39402
	GFP siRNA treatment
Control	52.3352	75.7606	40.8085	28.7239	37.7409	27.2366	23.4254	18.1268	14.5944	16.1746	32.6282	42.8535	25.0986	63.9549	34.9521	34.1155	22.124	16.4535
BL (10-4M)	9.20282	8.64507	13.3859	9.0169	13.6648	19.8	16.7324	0	38.5775	8.18028	14.5944	48.6169	31.6986	6.32113	24.3549	2.60282	24.262	3.06761
	PxylGr34 siRNA treatment
Control	25.2982	28.8145	24.8098	11.1351	8.20482	19.8283	25.6889	8.3025	36.6287	17.2887	15.5305	1.75818	19.1446	9.27926	20.1213	29.9867	17.6794	45.9594	11.9323
BL (10-4M)	8.49785	12.6979	17.8748	13.284	11.9165	11.8189	21.1958	23.247	24.3214	3.321	13.9677	12.7956	9.47461	22.7586	15.8236	28.8145	15.1399	43.6552	11.5278
