# Supplementary material for: A gustatory receptor tuned to the steroid plant hormone brassinolide in Plutella xylostella (Lepidoptera: Plutellidae)
Source: eLife. 2020 Dec 11;9:e64114. doi: 10.7554/eLife.64114 (PMC7806260; doi:10.7554/eLife.64114)
Supplement: Supplementary file 1. [file elife-64114-supp1.docx]

**Supplementary file 1. Sequence information for gustatory receptors of *Plutella xylostella***

| Reported PxylGrs | PxylGrs in this study | GenBank number | Notes |
| --- | --- | --- | --- |
| PxylGr1* | PxylGr1 | XP_011560061.1 |  |
| PxylGr2* | PxylGr2 | XP_011560059.1 |  |
| PxylGr3* | PxylGr3 | XP_011560063.1 |  |
| PxylGr4* | PxylGr4 | XP_011560065.1 |  |
| PxylGr5* | PxylGr5 | XP_011568607.1 |  |
| PxylGr6* | (delete) |  | Partial sequence of PxylGr5 |
| PxylGr7* | PxylGr7 | XP_011557481.1 |  |
| PxylGr8* | PxylGr8 | XP_011558222.1 |  |
| PxylGr9* | (delete) |  | Partial sequence of PxylGr8 |
| PxylGr10* | PxylGr10 |  |  |
| PxylGr11* | PxylGr11 |  |  |
| PxylGr12* | PxylGr12 |  |  |
| PxylGr13* | PxylGr13 |  |  |
| PxylGr14* | PxylGr14 |  |  |
| PxylGr15* | PxylGr15 |  |  |
| PxylGr16* | PxylGr16 |  |  |
| PxylGr17* | PxylGr17 |  |  |
| PxylGr18* | PxylGr18 |  |  |
| PxylGr19* | PxylGr19 |  |  |
| PxylGr20* | PxylGr20 |  |  |
| PxylGr21* | PxylGr21 |  |  |
| PxylGr22* | PxylGr22 |  |  |
| PxylGr23* | PxylGr23 |  |  |
| PxylGr24* | (delete) |  | Partial sequence of PxylGr19 |
| PxylGr25* | (delete) |  | Repetitive sequence with PxylGr20 |
| PxylGr26* | (delete) |  | Partial sequence of PxylGr21 |
| PxylGr27* | (delete) |  | Repetitive sequence with PxylGr22 |
| PxylGr28* | (delete) |  | Repetitive sequence with PxylGr23 |
| PxylGr29* | PxylGr29 |  |  |
| PxylGr30* | PxylGr30 | XP_011561237.1 |  |
| PxylGr31* | PxylGr31 | XP_011561224.1 |  |
| PxylGr32* | PxylGr32 |  |  |
| PxylGr33* | PxylGr33 |  |  |
| PxylGr34* | PxylGr34 |  |  |
| PxylGr35* | PxylGr35 | XP_011565113.1 |  |
| PxylGr36* | PxylGr36 |  |  |
| PxylGr37* | PxylGr37 | XP_011548483.1 |  |
| PxylGr38* | PxylGr38 | XP_011552106.1 |  |
| PxylGr39* | PxylGr39 |  |  |
| PxylGr40* | PxylGr40 |  |  |
| PxylGr41* | PxylGr41 |  |  |
| PxylGr42* | PxylGr42 |  |  |
| PxylGr43* | PxylGr43 |  |  |
| PxylGr44* | PxylGr44 |  |  |
| PxylGr45* | PxylGr45 |  |  |
| PxylGr46* | PxylGr46 |  |  |
| PxylGr47* | PxylGr47 |  |  |
| PxylGr48* | PxylGr48 |  |  |
| PxylGr49* | PxylGr49 |  |  |
| PxylGr50* | PxylGr50 |  |  |
| PxylGr51* | PxylGr51 |  |  |
| PxylGr52* | PxylGr52 |  |  |
| PxylGr53* | PxylGr53 |  |  |
| PxylGr54* | PxylGr54 |  |  |
| PxylGr55* | PxylGr55 |  |  |
| PxylGr56* | PxylGr56 |  |  |
| PxylGr57* | PxylGr57 |  |  |
| PxylGr58* | PxylGr58 |  |  |
| PxylGr59* | PxylGr59 |  |  |
| PxylGr60* | PxylGr60 |  |  |
| PxylGr61* | PxylGr61 |  |  |
| PxylGr62* | PxylGr62 |  |  |
| PxylGr63* | PxylGr63 |  |  |
| PxylGr64* | PxylGr64 |  |  |
| PxylGr65* | PxylGr65 |  |  |
| PxylGr66* | PxylGr66 |  |  |
| PxylGr67* | PxylGr67 |  |  |
| PxylGr68* | PxylGr68 |  |  |
| PxylGr69* | PxylGr69 |  |  |
| PxylGR1# | (delete) |  | Partial sequence of PxylGr75 |
| PxylGR2# | (delete) |  | Partial sequence of PxylGr34 |
| PxylGR3# | PxylGr72 |  |  |
| PxylGR4# | PxylGr73 |  |  |
| PxylGR5# | (delete) |  | Partial sequence of Gr77 |
| PxylGR6# | (delete) |  | Longer than PxylGr5 |
| PxylGR7# | (delete) |  | Partial sequence of Gr77 |
| PxylGr64f-like※ | PxylGr77 | XP_011560052.1 |  |
| PxylGr64f-like※ | PxylGr78 | XP_011560051.1 |  |
| PxylGr28b※ | PxylGr79 | XP_011565110.1 |  |

*: Named by Engsontia et al., 2014; #: Named by Yang et al., 2017; ※: Acquired from the GenBank
